# Supplementary material for: Antimicrobial and Antibiofilm Activities of New Synthesized Silver Ultra-NanoClusters (SUNCs) Against Helicobacter pylori
Source: PubMed Central journal article supplement (PMC7411087; doi:10.3389/fmicb.2020.01705), 2020-07-31
Supplement: Data_Sheet_1.pdf [file Data_Sheet_1.pdf]

## Supplementary material

### Antimicrobial and antibiofilm activities of new synthesized Silver Ultra-NanoClusters (SUNCs) against *Helicobacter pylori*

**Rossella Grande<sup>1,4§</sup>, Francesca Sisto<sup>2,§,\*</sup>, Valentina Puca<sup>3,4</sup>, Simone Carradori<sup>1</sup>, Maurizio Ronci<sup>1,4</sup>, Antonio Aceto<sup>5</sup>, Raffaella Muraro<sup>5</sup>, Gabriella Mincione<sup>5</sup> and Luca Scotti<sup>5</sup>**

<sup>1</sup>Department of Pharmacy, “G. d’Annunzio” University of Chieti-Pescara, Chieti, Italy

<sup>2</sup>Department of Biomedical, Surgical and Dental Sciences, University of Milan, Milan, Italy

<sup>3</sup>Department of Medicine and Aging Science, “G. d’Annunzio” University of Chieti-Pescara, Chieti, Italy

<sup>4</sup>Center for Advanced Studies and Technology (CAST), “G. d’Annunzio” University of Chieti-Pescara, Chieti, Italy

<sup>5</sup>Department of Medical, Oral, and Biotechnological Sciences, “G. d’Annunzio” University of Chieti-Pescara, Chieti, Italy

**§These authors contributed equally to this work.**

\*Francesca Sisto, Department of Biomedical, Surgical and Dental Sciences, University of Milan, Via Pascal 36, 20133 Milan, Italy. Phone 0039 2 250315064; Fax 0039 2 50315068; E-mail: [francesca.sisto@unimi.it](mailto:francesca.sisto@unimi.it)

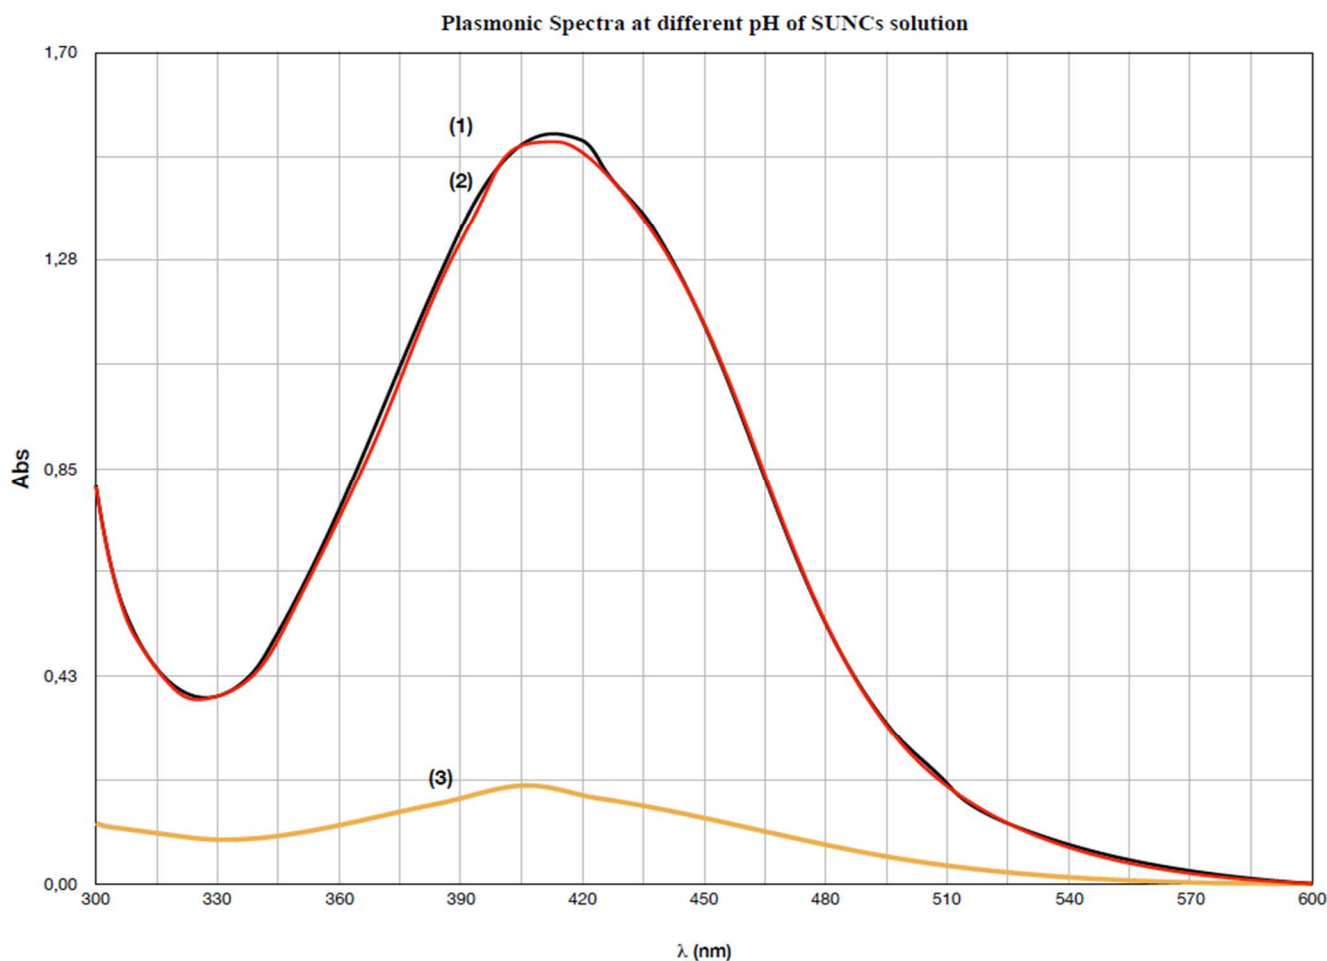

**Figure S1.** (1) UV spectrum of SUNCs solution (25 ppm - pH 7.5 in UP-water); (2) UV spectrum of SUNCs after 1 h of incubation at pH 3.5 in 0.01 M acetate buffer; (3) UV spectrum of SUNCs solution after nitric acid treatment (0.15 M, pH<1) for 10 min at 25 °C. The complete disappearance of the plasmonic spectrum was obtained after 60 min treatment with nitric acid (0.24 M, pH<1) at 60 °C. All spectra were recorded at different pHs with a double beam spectrophotometer (Jasco 7800, Japan), normalised at the same SUNCs concentration after blank (buffer without SUNCs) subtraction.

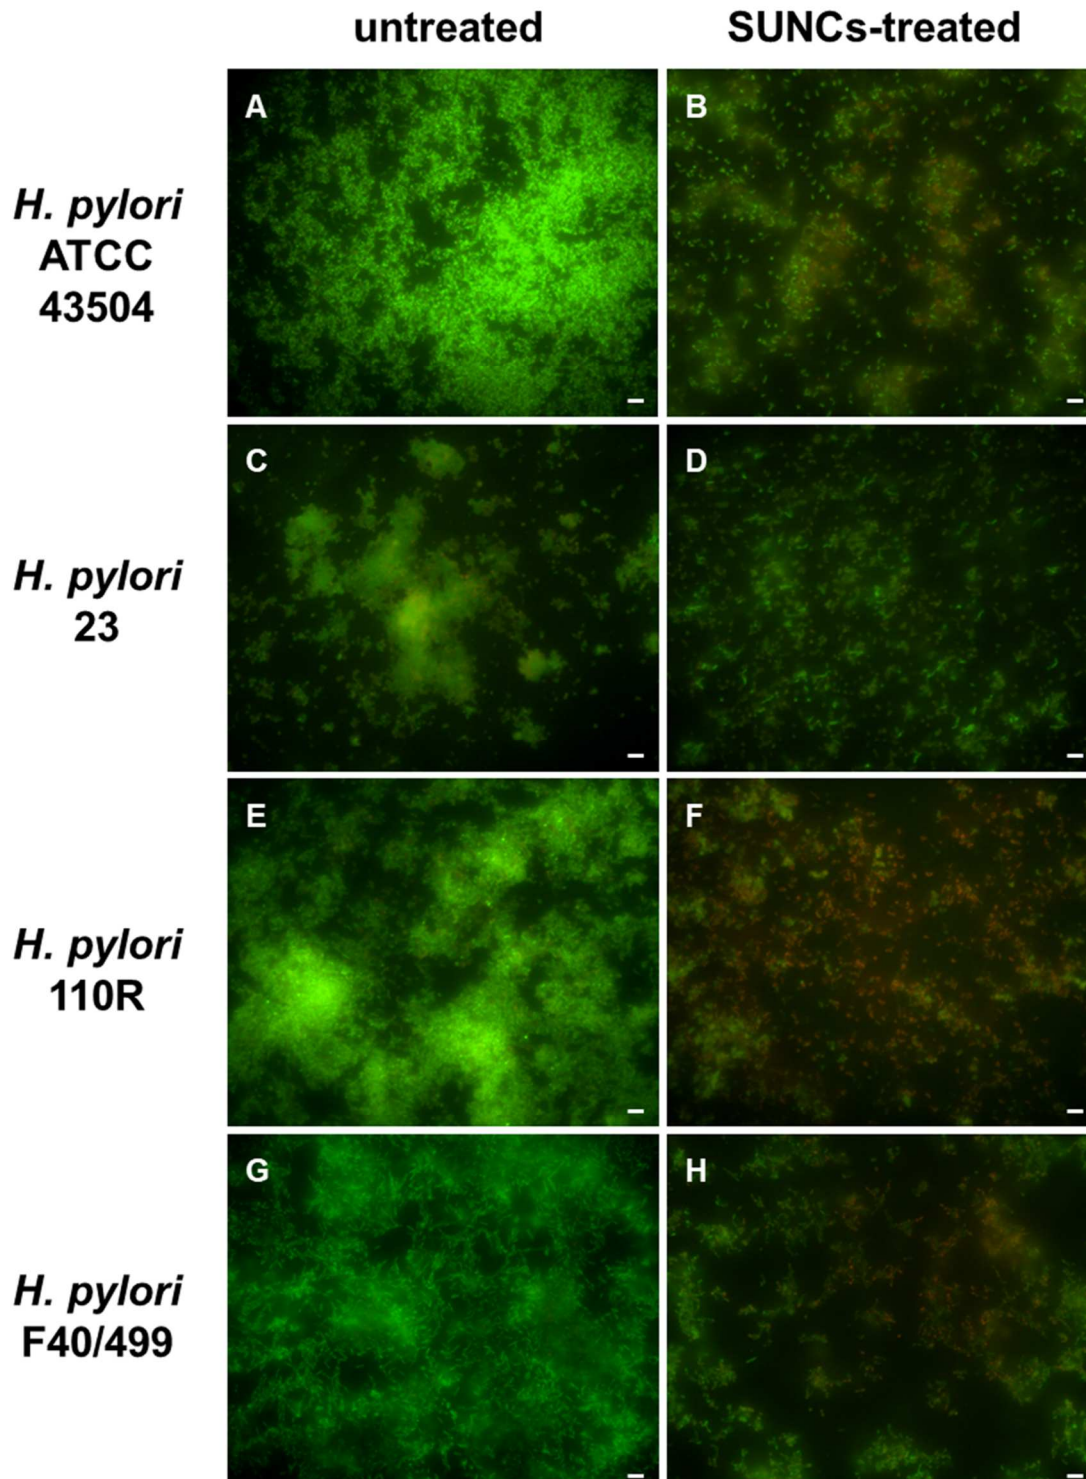

**Figure S2.** Additional representative *H. pylori* biofilms images stained with Live/Dead kit and analysed using fluorescence microscopy. The green fluorescence indicates the live cells, whereas the red fluorescence indicates the dead cells or cells with a damaged cell wall. Panels (A), (C), (E), (G) show the untreated *H. pylori* biofilms, while panels (B), (D), (F), and (H) show *H. pylori* biofilms treated with SUNCs at MBEC concentration of 1.28 mg/L for *H. pylori* strains ATCC 43504 and 23; 0.96 mg/L for 110 R, and 0.64 mg/L for F40/499. Scale bar: 5  $\mu$ m.

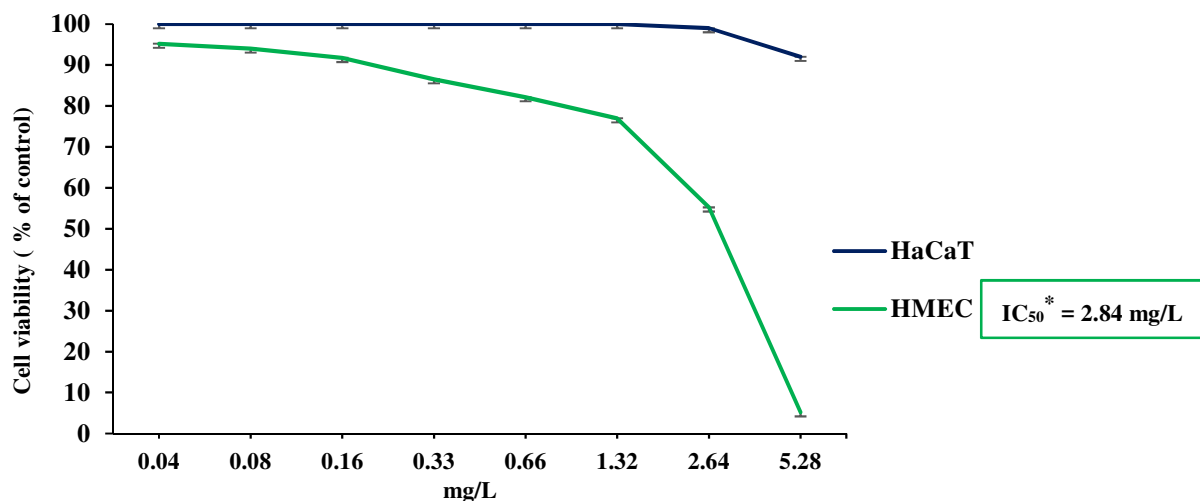

**Figure S3.** Cell viability after treatment with SUNCs by MTT assay. HaCaT and HMEC-1 cells were incubated for 24 h with different doses of SUNCs in DMEM high glucose and MCDB131, respectively. The effect is expressed as percentage of the optical density (OD)  $\pm$  SD measured in non-treated cultures (100% viability).

\*Reed, L. J. & Muench, H. A simple method of estimating fifty percent endpoints. (1938). *Am J Hyg.* 27, 493–497.

### Supplementary cell culture

HaCaT cells were cultured in a 5% CO<sub>2</sub> atmosphere in DMEM high glucose (HyClone, Logan, UT) with 10% (v/v) decompeted fetal bovine serum (FBS); HMEC were cultured in MCDB131 (Thermo Fisher Scientific, Waltham, MA, USA) with 10 ng/mL Epidermal Growth Factor (EGF) (Milteny Biotec, USA), 1  $\mu$ g/mL Hydrocortisone (Sigma Aldrich), and 10% FBS in a 5% CO<sub>2</sub> incubator.
